# Supplementary material for: The infectious synapse formed between mature dendritic cells and CD4+ T cells is independent of the presence of the HIV-1 envelope glycoprotein
Source: PubMed Central journal article supplement (PMC3640963; doi:10.1186/1742-4690-10-42), 2013-04-16

# Additional File 1

**A**

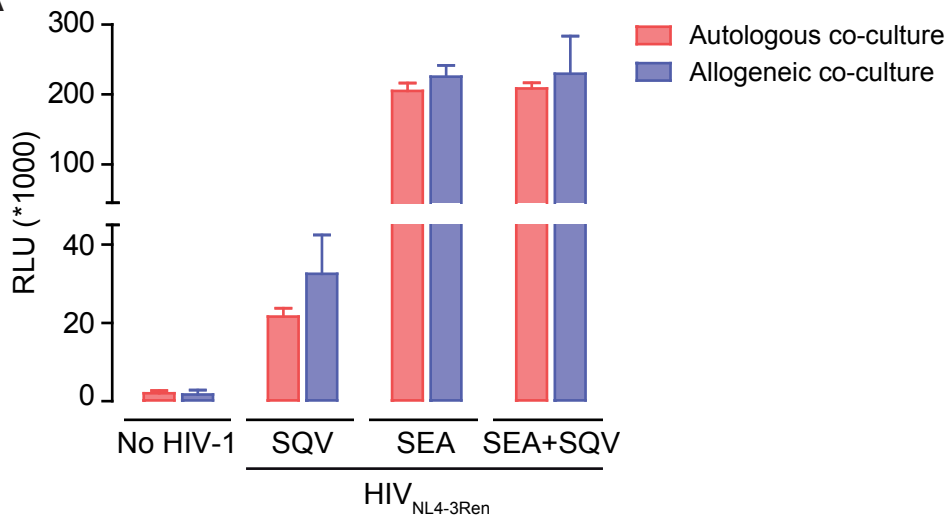

**B**

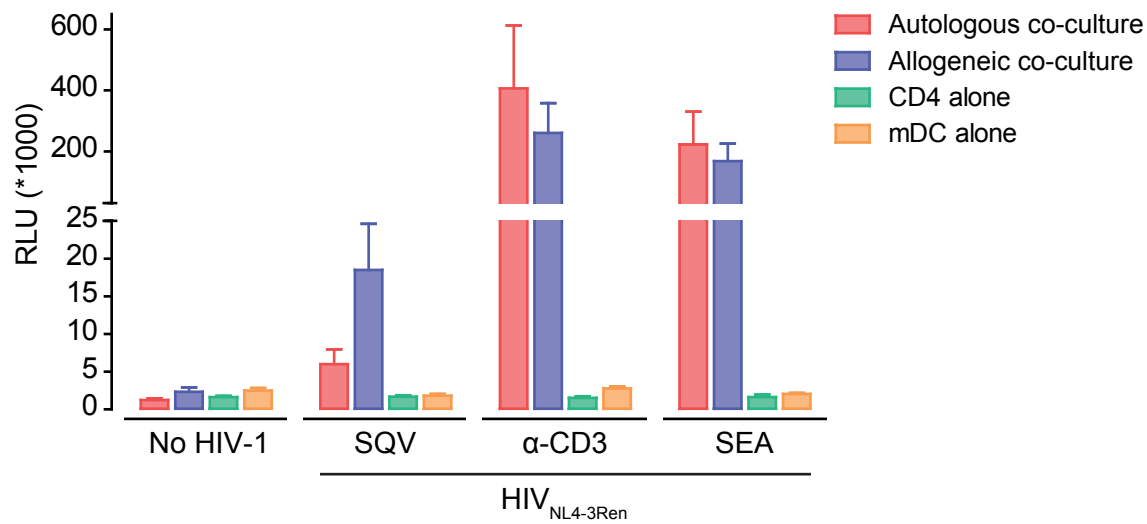

Supplement: 1742-4690-10-42-S1.pdf [file 1742-4690-10-42-S1.pdf]
